# Supplementary material for: High Resolution Melting Analysis for Rapid Mutation Screening in Gyrase and Topoisomerase IV Genes in Quinolone-Resistant Salmonella enterica
Source: Biomed Res Int. 2014 Oct 12;2014:718084. doi: 10.1155/2014/718084 (PMC4209765; doi:10.1155/2014/718084)
Supplement: Supplementary file 1 — The background of the Salmonella strains used to develop the HRM assay is tabulated in the supplementary table (Table S1). Additional information include the susceptibility of each Salmonella strain to nalidixic acid and the corresponding minimum inhibitory concentration value, type of base substitution and the corresponding amino acid change in each strain, and the melting temperature of the HRM amplicons. [file 718084.f1.xlsx]

## Sheet: Sheet1
Table S1 Detailed strain information for all Salmonella strains used in developing HRM assay
Strain	Organism	Source	Nalidixic acid		gyrA			gyrB			parC			parE
			Susceptibilitya (disk diffusion)	Minimum inhibitory concentration (MIC) (µg/mL)	Base substitutionb	Amino acid substitutionc	Melting temperature (°C)d	Base substitutionb	Amino acid substitutionc	Melting temperature (°C)d	Base substitutionb	Amino acid substitutionc	Melting temperature (°C)d	Base substitutionb	Amino acid substitutionc	Melting temperature (°C)d
SE 109/07	Salmonella Enteritidis	Clinical	R	>256	G259T	D87Y	82.12	C1194G, C1203G, T1206C, T1230C, T1353C, T1386C, C1392T	silent mutations	86.47	none	none	86.22	C1341T, G1347A, A1380G, C1527T, G1561T, A1569T	V521F (not within QRDR)	85.15
SE 005/03	Salmonella Enteritidis	Zoonotic	R	>256	G259T	D87Y	82.11	C1194G, C1203G, T1206C, T1230C, T1353C, T1386C, C1392T	silent mutations	86.53	none	none	86.26	C1341T, G1347A, A1380G, C1527T, A1569T	silent mutations	85.22
SE 022/03	Salmonella Enteritidis	Zoonotic	R	>256	G259T	D87Y	82.23	C1194G, C1203G, T1206C, T1230C, T1353C, T1386C, C1392T	silent mutations	86.57	none	none	86.28	C1341T, G1347A, A1380G, C1527T, A1569T	silent mutations	84.91
SE 026/03	Salmonella Enteritidis	Zoonotic	R	>256	G259T	D87Y	82.2	C1194G, C1203G, T1206C, T1230C, T1353C, T1386C, C1392T	silent mutations	86.32	none	none	86.36	C1341T, G1347A, A1380G, C1527T, A1569G	silent mutations	85.1
SE 027/03	Salmonella Enteritidis	Zoonotic	R	>256	G259T	D87Y	82.23	C1194G, C1203G, T1206C, T1230C, T1353C, T1386C, C1392T	silent mutations	86.22	none	none	86.38	C1341T, G1347A, A1380G, C1527T, A1569T	silent mutations	85.18
SE 028/03	Salmonella Enteritidis	Zoonotic	R	>256	G259T	D87Y	82.29	C1194G, C1203G, T1206C, T1230C, T1353C, T1386C, C1392T	silent mutations	86.29	none	none	86.35	C1341T, G1347A, A1380G, C1527T, A1569T	silent mutations	85.14
SE 032/03	Salmonella Enteritidis	Zoonotic	R	>256	G259T	D87Y	82.17	C1194G, C1203G, T1206C, T1230C, T1353C, T1386C, C1392T	silent mutations	86.59	none	none	86.28	C1341T, G1347A, A1380G, C1527T, A1569T	silent mutations	84.99
SE 033/03	Salmonella Enteritidis	Zoonotic	R	>256	G259T	D87Y	82.09	C1194G, C1203G, T1206C, T1230C, T1353C, T1386C, C1392T	silent mutations	86.45	none	none	86.15	C1341T, G1347A, A1380G, C1527T, A1569T	silent mutations	84.97
SE 047/04	Salmonella Enteritidis	Zoonotic	R	>256	G259T	D87Y	82.27	C1194G, C1203G, T1206C, T1230C, T1353C, T1386C, C1392T	silent mutations	86.29	none	none	86.39	C1341T, G1347A, A1380G, C1527T, A1569T	silent mutations	85.2
SE 054/05	Salmonella Enteritidis	Clinical	R	>256	G259T	D87Y	82.13	C1194G, C1203G, T1206C, T1230C, T1353C, T1386C, C1392T	silent mutations	86.51	none	none	86.23	C1341T, G1347A, A1380G, C1527T, A1569T	silent mutations	84.96
SE 064/05	Salmonella Enteritidis	Zoonotic	R	>256	G259T	D87Y	82.2	C1194G, C1203G, T1206C, T1230C, T1353C, T1386C, C1392T	silent mutations	86.57	none	none	86.29	C1341T, G1347A, A1380G, C1527T, A1569T	silent mutations	85
SE 066/05	Salmonella Enteritidis	Zoonotic	R	>256	G259T	D87Y	82.28	C1194G, C1203G, T1206C, T1230C, T1353C, T1386C, C1392T	silent mutations	86.34	none	none	86.34	C1341T, G1347A, A1380G, C1527T, A1569T	silent mutations	84.98
SE 067/05	Salmonella Enteritidis	Zoonotic	R	>256	G259T	D87Y	82.19	C1194G, C1203G, T1206C, T1230C, T1353C, T1386C, C1392T	silent mutations	86.28	none	none	86.42	C1341T, G1347A, A1380G, C1527T, A1569T	silent mutations	84.96
SE 069/05	Salmonella Enteritidis	Zoonotic	R	>256	G259T	D87Y	82.22	C1194G, C1203G, T1206C, T1230C, T1353C, T1386C, C1392T	silent mutations	86.37	none	none	86.35	C1341T, G1347A, A1380G, C1527T, A1569T	silent mutations	85
SE 073/05	Salmonella Enteritidis	Zoonotic	R	>256	G259T	D87Y	82.18	C1194G, C1203G, T1206C, T1230C, T1353C, T1386C, C1392T	silent mutations	86.58	none	none	86.29	C1341T, G1347A, A1380G, C1527T, A1569T	silent mutations	84.97
SE 075/05	Salmonella Enteritidis	Zoonotic	R	>256	G259T	D87Y	82.17	C1194G, C1203G, T1206C, T1230C, T1353C, T1386C, C1392T	silent mutations	86.59	none	none	86.29	C1341T, G1347A, A1380G, C1527T, A1569T	silent mutations	85.18
SE 078/05	Salmonella Enteritidis	Zoonotic	R	>256	G259T	D87Y	82.11	C1194G, C1203G, T1206C, T1230C, T1353C, T1386C, C1392T	silent mutations	86.53	none	none	86.27	C1341T, G1347A, A1380G, C1527T, A1569T	silent mutations	85.05
SE 080/05	Salmonella Enteritidis	Zoonotic	R	>256	G259T	D87Y	82.12	C1194G, C1203G, T1206C, T1230C, T1353C, T1386C, C1392T	silent mutations	86.57	none	none	86.28	C1341T, G1347A, A1380G, C1527T, A1569T	silent mutations	85.03
SE 081/05	Salmonella Enteritidis	Zoonotic	R	>256	G259T	D87Y	82.25	C1194G, C1203G, T1206C, T1230C, T1353C, T1386C, C1392T	silent mutations	86.31	none	none	86.24	C1341T, G1347A, A1380G, C1527T, A1569T	silent mutations	85.22
SE 086/06	Salmonella Enteritidis	Clinical	R	>256	G259T	D87Y	82.16	C1194G, C1203G, T1206C, T1230C, T1353C, T1386C, C1392T	silent mutations	86.32	none	none	86.34	C1341T, G1347A, A1380G, C1527T, A1569T	silent mutations	84.96
SE 101/07	Salmonella Enteritidis	Clinical	R	>256	G259T	D87Y	82.11	C1194G, C1203G, T1206C, T1230C, T1353C, T1386C, C1392T	silent mutations	86.5	none	none	86.27	C1341T, G1347A, A1380G, C1527T, A1569T	silent mutations	85.21
SE 104/07	Salmonella Enteritidis	Clinical	R	>256	G259T	D87Y	82.1	C1194G, C1203G, T1206C, T1230C, T1353C, T1386C, C1392T	silent mutations	86.53	none	none	86.26	C1341T, G1347A, A1380G, C1527T, A1569T	silent mutations	85.1
SE 105/07	Salmonella Enteritidis	Clinical	R	>256	G259T	D87Y	82.24	C1194G, C1203G, T1206C, T1230C, T1353C, T1386C, C1392T	silent mutations	86.25	none	none	86.33	C1341T, G1347A, A1380G, C1527T, A1569T	silent mutations	84.96
SE 106/07	Salmonella Enteritidis	Clinical	R	>256	G259T	D87Y	82.2	C1194G, C1203G, T1206C, T1230C, T1353C, T1386C, C1392T	silent mutations	86.57	none	none	86.3	C1341T, G1347A, A1380G, C1527T, A1569T	silent mutations	85.18
SE 107/07	Salmonella Enteritidis	Clinical	R	>256	G259T	D87Y	82.29	C1194G, C1203G, T1206C, T1230C, T1353C, T1386C, C1392T	silent mutations	86.34	none	none	86.36	C1341T, G1347A, A1380G, C1527T, A1569T	silent mutations	85.2
SE 002/03	Salmonella Enteritidis	Zoonotic	R	192	G259T	D87Y	82.1	C1194G, C1203G, T1206C, T1230C, T1353C, T1386C, C1392T	silent mutations	86.42	none	none	86.15	C1341T, G1347A, A1380G, C1527T, A1569T	silent mutations	85.22
SE 076/05	Salmonella Enteritidis	Zoonotic	R	192	G259T	D87Y	82.28	C1194G, C1203G, T1206C, T1230C, T1353C, T1386C, C1392T	silent mutations	86.37	none	none	86.36	C1341T, G1347A, A1380G, C1527T, A1569T	silent mutations	85.01
SE 004/03	Salmonella Enteritidis	Zoonotic	R	128	G259T	D87Y	82.13	C1194G, C1203G, T1206C, T1230C, T1353C, T1386C, C1392T	silent mutations	86.51	none	none	86.22	C1341T, G1347A, A1380G, C1527T, A1569T	silent mutations	84.98
SE 048/04	Salmonella Enteritidis	Zoonotic	R	128	G259T	D87Y	82.17	C1194G, C1203G, T1206C, T1230C, T1353C, T1386C, C1392T	silent mutations	86.54	none	none	86.26	C1341T, G1347A, A1380G, C1527T, A1569T	silent mutations	85
SE 097/06	Salmonella Enteritidis	Clinical	R	128	G259T	D87Y	82.19	C1194G, C1203G, T1206C, T1230C, T1353C, T1386C, C1392T	silent mutations	86.56	none	none	86.29	C1341T, G1347A, A1380G, C1527T, A1569T	silent mutations	84.99
SE 074/05	Salmonella Enteritidis	Zoonotic	R	96	G259T	D87Y	82.21	C1194G, C1203G, T1206C, T1230C, T1353C, T1386C, C1392T	silent mutations	86.57	none	none	86.28	C1341T, G1347A, A1380G, C1527T, A1569T	silent mutations	85.14
SE 090/06	Salmonella Enteritidis	Clinical	R	96	G259T	D87Y	82.22	C1194G, C1203G, T1206C, T1230C, T1353C, T1386C, C1392T	silent mutations	86.36	none	none	86.35	C1341T, G1347A, A1380G, C1527T, A1569T	silent mutations	85.02
SE 068/05	Salmonella Enteritidis	Zoonotic	R	64	G259T	D87Y	82.16	C1194G, C1203G, T1206C, T1230C, T1353C, T1386C, C1392T	silent mutations	86.51	none	none	86.22	C1341T, G1347A, A1380G, C1527T, A1569T	silent mutations	84.86
SE 102/07	Salmonella Enteritidis	Clinical	R	64	G259T	D87Y	82.18	C1194G, C1203G, T1206C, T1230C, T1353C, T1386C, C1392T	silent mutations	86.49	none	none	86.23	C1341T, G1347A, A1380G, C1527T, A1569T	silent mutations	85.09
SE 046/04	Salmonella Enteritidis	Zoonotic	R	48	G259T	D87Y	82.22	C1194G, C1203G, T1206C, T1230C, T1353C, T1386C, C1392T	silent mutations	86.34	none	none	86.35	C1341T, G1347A, A1380G, C1527T, A1569T	silent mutations	84.91
SE 049/04	Salmonella Enteritidis	Zoonotic	R	48	G259T	D87Y	82.19	C1194G, C1203G, T1206C, T1230C, T1353C, T1386C, C1392T	silent mutations	86.52	none	none	86.24	C1341T, G1347A, A1380G, C1527T, A1569T	silent mutations	84.91
SE 084/05	Salmonella Enteritidis	Zoonotic	R	24	G259T	D87Y	82.15	C1194G, C1203G, T1206C, T1230C, T1353C, T1386C, C1392T	silent mutations	86.53	none	none	86.22	C1341T, G1347A, A1380G, C1527T, A1569T	silent mutations	85.19
SE 001/03	Salmonella Enteritidis	Zoonotic	RS	16	G259T	D87Y	82.21	C1194G, C1203G, T1206C, T1230C, T1353C, T1386C, C1392T	silent mutations	86.41	none	none	86.34	C1341T, G1347A, A1380G, C1527T, A1569T	silent mutations	85.02
SE 065/05	Salmonella Enteritidis	Zoonotic	R	16	G259T	D87Y	82.19	C1194G, C1203G, T1206C, T1230C, T1353C, T1386C, C1392T	silent mutations	86.32	none	none	86.39	C1341T, G1347A, A1380G, C1527T, A1569T	silent mutations	85.02
STM 032/04	Salmonella Typhimurium	Clinical	R	>256	A260G	D87G	83.49	none	none	86.19	none	none	86.2	none	none	84.71
SE 089/06	Salmonella Enteritidis	Clinical	R	>256	A260G	D87G	82.96	C1194G, C1203G, T1206C, T1230C, T1353C, T1386C, C1392T	silent mutations	86.57	none	none	86.27	C1341T, G1347A, A1380G, C1527T, A1569T	silent mutations	84.98
SE 095/06	Salmonella Enteritidis	Clinical	R	>256	A260G	D87G	83.02	C1194G, C1203G, T1206C, T1230C, T1353C, T1386C, C1392T	silent mutations	86.64	none	none	86.36	C1341T, G1347A, A1380G, C1527T, A1569T	silent mutations	84.96
SE 070/05	Salmonella Enteritidis	Zoonotic	R	128	A260G	D87G	82.93	C1194G, C1203G, T1206C, T1230C, T1353C, T1386C, C1392T	silent mutations	86.55	none	none	86.25	C1341T, G1347A, A1380G, C1527T, A1569T	silent mutations	85
SE 050/04	Salmonella Enteritidis	Zoonotic	R	64	A260G	D87G	82.96	C1194G, C1203G, T1206C, T1230C, T1353C, T1386C, C1392T	silent mutations	86.32	none	none	86.28	C1341T, G1347A, A1380G, C1527T, A1569T	silent mutations	84.98
SE 012/03	Salmonella Enteritidis	Zoonotic	R	>256	G259A	D87N	82.15	C1194G, C1203G, T1206C, T1230C, T1353C, T1386C, C1392T	silent mutations	86.59	none	none	86.31	C1341T, G1347A, A1380G, C1527T, A1569T	silent mutations	84.99
SE 015/03	Salmonella Enteritidis	Zoonotic	R	>256	G259A	D87N	82.15	C1194G, C1203G, T1206C, T1230C, T1353C, T1386C, C1392T	silent mutations	86.55	none	none	86.27	C1341T, G1347A, A1380G, C1527T, A1569T	silent mutations	85.06
SE 013/03	Salmonella Enteritidis	Zoonotic	R	96	G259A	D87N	82.27	C1194G, C1203G, T1206C, T1230C, T1353C, T1386C, C1392T	silent mutations	86.3	none	none	86.37	C1341T, G1347A, A1380G, C1527T, A1569T	silent mutations	85.07
STM 043/05	Salmonella Typhimurium	Zoonotic	R	>256	C248T	S83F	82.37	C1194G, T1197C, C1203G, T1206C, T1230C, A1341G, T1353C, T1386C, C1392T, G1410A, C1413T, C1462T	silent mutations	85.98	T303C, C306G, G312A, G351A, C369T, T411C, C450G, T201C, C225T, T231C	silent mutations	86.37	C1240T, G1251C, G1347A, A1380G, T1392C, C1527T	silent mutations	84.55
SE 055/05	Salmonella Enteritidis	Clinical	R	>256	C248T	S83F	82.31	C1194G, C1203G, T1206C, T1230C, T1353C, T1386C, C1392T	silent mutations	86.57	none	none	86.29	C1341T, G1347A, A1380G, C1527T, A1569T	silent mutations	84.9
SE 051/04	Salmonella Enteritidis	Zoonotic	R	>256	T247A, C248T	S83I	82.18	C1194G, C1203G, T1206C, T1230C, T1353C, T1386C, C1392T	silent mutations	86.34	none	none	86.38	C1341T, G1347A, A1380G, C1527T, A1569T	silent mutations	85.22
SE 052/04	Salmonella Enteritidis	Zoonotic	R	>256	T247A, C248T	S83I	82.17	C1194G, C1203G, T1206C, T1230C, T1353C, T1386C, C1392T	silent mutations	86.34	none	none	86.35	C1341T, G1347A, A1380G, C1527T, A1569T	silent mutations	84.89
SE 099/06	Salmonella Enteritidis	Clinical	R	>256	C248A	S83Y	82.26	C1194G, C1203G, T1206C, T1230C, T1353C, T1386C, C1392T	silent mutations	86.34	none	none	86.34	C1341T, G1347A, A1380G, C1527T, A1569T	silent mutations	85.01
STM 018/03	Salmonella Typhimurium	Clinical	R	24	none	none	82.52	C1194G, C1203G, T1206C, T1230C, T1353C, T1386C, C1392T	silent mutations	86.26	none	none	86.22	G1314A	M438I	83.88
STM 071/07	Salmonella Typhimurium	Food	R	64	none	none	82.56	C1194G, C1203G, T1206C, T1230C, T1353C, T1386C, C1392T	silent mutations	86.32	none	none	86.33	none	none	84.84
STM 055/05	Salmonella Typhimurium	Clinical	R	32	none	none	82.71	C1194G, C1203G, T1206C, T1230C, T1353C, T1386C, C1392T	silent mutations	86.25	none	none	86.19	none	none	84.76
STM 006/02	Salmonella Typhimurium	Clinical	RS	16	none	none	82.67	C1194G, C1203G, T1206C, T1230C, T1353C, T1386C, C1392T	silent mutations	86.31	none	none	86.23	none	none	84.72
STM 033/04	Salmonella Typhimurium	Clinical	R	16	none	none	83.04	C1194G, C1203G, T1206C, T1230C, T1353C, T1386C, C1392T	silent mutations	86.3	none	none	86.17	none	none	84.68
STM 053/05	Salmonella Typhimurium	Clinical	RS	16	none	none	82.68	C1194G, C1203G, T1206C, T1230C, T1353C, T1386C, C1392T	silent mutations	86.31	none	none	86.19	none	none	84.78
STM 056/05	Salmonella Typhimurium	Clinical	RS	16	none	none	82.69	C1194G, C1203G, T1206C, T1230C, T1353C, T1386C, C1392T	silent mutations	86.26	none	none	86.11	none	none	84.79
STM 034/04	Salmonella Typhimurium	Clinical	RS	12	none	none	83.1	C1194G, C1203G, T1206C, T1230C, T1353C, T1386C, C1392T	silent mutations	86.3	none	none	86.23	none	none	84.71
STM 048/05	Salmonella Typhimurium	Food	RS	8	none	none	83.09	C1194G, C1203G, T1206C, T1230C, T1353C, T1386C, C1392T	silent mutations	86.3	none	none	86.12	none	none	84.9
STM 057/05	Salmonella Typhimurium	Clinical	RS	6	none	none	82.63	none	none	86.17	none	none	86.14	none	none	84.84
a R, resistant; RS, reduced susceptibility
b A, adenine; C, cytosine; G, guanine; T, thymine; The first letter indicates the original nucleotide, follow by numbers that indicate the position of the nucleotide in respective gene, and the last letter indicates the nucleotide that substituted the original nucleotide in the position mentioned. For example, G259T means thymine substituted guanine in position 259 in gyrA gene.
c D, aspartic acid; F, phenylalanine; G, glycine; I, isoleucine; M, methionine; N, asparagine; S, serine; V, valine; Y, tyrosine; The first letter indicates the original amino acid, follow by numbers that indicate the position of the amino acid in respective gene, and the last letter indicates the amino acid that substituted the original amino acid in the position mentioned. For example, D87Y mea…
d The melting temperature of the HRM amplicon
